# Supplementary material
Source: Springer Nature journal article supplement (https://www.springermedizin.de/resource/supplementary/12872_2014_741_MOESM5_ESM.pdf/9430780)

*ae3*<sup>+/+</sup>

*ae3*<sup>-/-</sup>

A

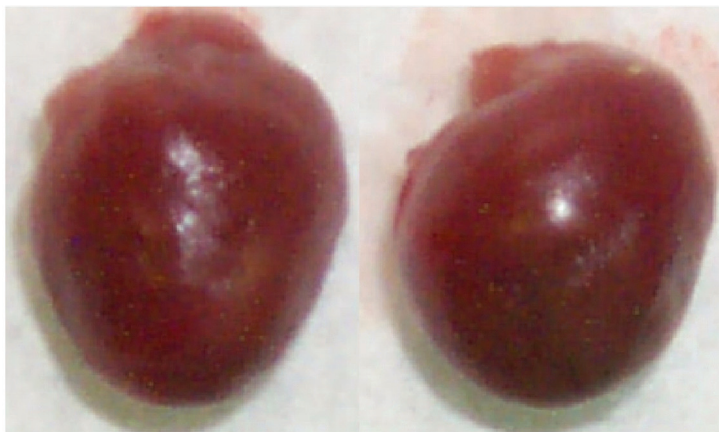

B

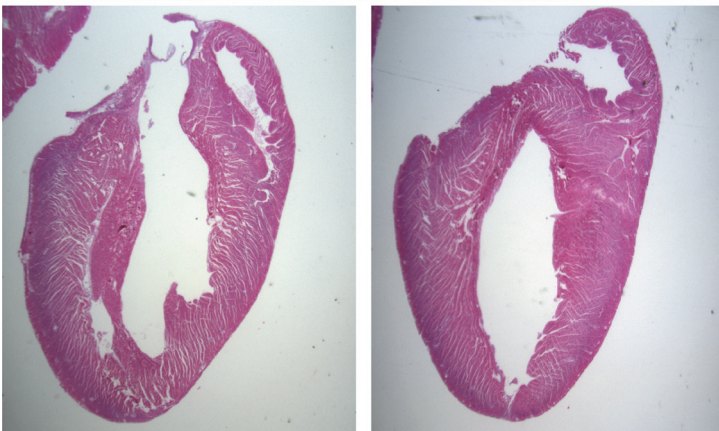

C

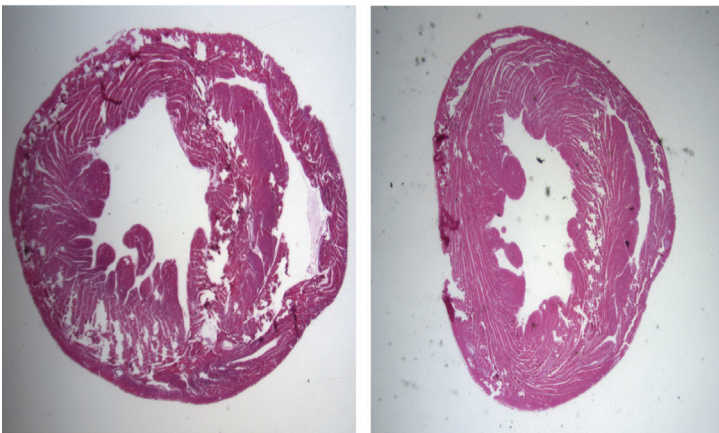

Supplement: MOESM5 [file 9430780]
